# Supplementary material for: The Influence of Landscape Heterogeneity - Ground Beetles (Coleoptera: Carabidae) in Fthiotida, Central Greece
Source: Biodivers Data J. 2014 Apr 11;(2):e1082. doi: 10.3897/BDJ.2.e1082 (PMC4031439; doi:10.3897/BDJ.2.e1082)
Supplement: Supplementary material 2 — Landscape Metrics [file biodiversity_data_journal-2-e1082-s002.xls]

## Sheet: Readme
	GBIF Global Names Architecture Darwin Core Archive format
	Basic Species Checklist Template - Standard Linnaean Classification
	Checklist-3_v1
	Use this template to record a basic columnar species checklist with limited annotations
Sheet Name	Purpose
Metadata	This sheet has the following sub sections. Each section has terms (in bold) and sample data.
Basic Metadata	This section is used to record the basic metadata about the classification.
People and Organizations	This section is used to record the authors of the metadata and of the classification.
Keywords and Coverage	This section records resource scope data
References	This section stores bibliographic references that support the data or data capture methods.
	This worksheet, when properly completed, can be transformed to a Ecological Metadata Language document using the GBIF Spreadsheet Processor that conforms to the GBIF EML Profile at http://rs.gbif.org/schema/eml-gbif-profile/dev/eml.xsd
Classification	This sheet is used to record the classification. The first row of this sheet has terms (in bold) and additional rows have sample data.
	Use this template to record species checklists in a simple columnar format that stores the basic taxonomic data in the following columns (Kingdom, Phylum, Subphylum, Class, Order, Family, Genus, Species, Infraspecies). Additional fields include entries for synonyms, common names, and distribution and other elements.
Instructions and definitions are obtained by hovering your cursor over cells with red upper-right corners.
	Select worksheets for data entry by selecting via the labeled tabs at the bottom of the screen
	Note 1: The classification worksheet includes sample data to illustrate the use of some of the data fields. Make sure to clear this sample data before using the worksheet.
	Note 2: Please do not modify this template by adding or deleting any row or column. As this would prevent the Speadsheet Processor from getting correct values. We aim to provide a more flexible template according to feedbacks from users in the future.

## Sheet: Metadata
Basic Metadata	Required fields are listed with an asterisk (*) next to the field label							Research Project
								Title	Doctoral Project - Soil Invertebrate Diversity in Different Agricultural Ecosystems in Greece
Universally Unique Identifier (UUID)								Lead Organisation	The National and Kapodistrian University of Athens		Country	Greece
* Title	The Influence of Landscape Heterogeneity – Ground Beetles (Coleoptera: Carabidae) in Fthiotida, Central Greece.							Description	A comparisons of heterogeneous and homogeneous areas of agriculture.
* Publication Date (MM/DD/YYYY)
* Expected Citation	Chapman, A. (2014) The Influence of Landscape Heterogeneity – Ground Beetles (Coleoptera: Carabidae) in Fthiotida, Central Greece. Biodiversity Data Journal.
* Abstract or concise description of the dataset	Pitfall traps were used to sample Carabidae in agricultural land of the Spercheios valley, Fthiotida, Central Greece. Four pairs of cultivated fields were sampled. One field of each pair was located in a heterogeneous area and the other in a more homogeneous area. Heterogeneous areas were composed of small fields. They had high percentages of non-cropped habitats and a high diversity of land use …
Additional information
Resource Language	English		Metadata Language		English
Resource URL			Resource Logo URL
Creative Commons Licensing	by-nc-sa
People and Organizations
Note: select agent roles from pulldown list (in rows 19-30)
	First Name	Last Name	Organization	Phone	Email	Homepage	Address	City	State/Province	Country	Zip/Postal Code	* Primary Contact
* Resource Creator	Anna	Chapman	The National and Kapodistrian University of Athens	0030 2294050204	a_chapman@biol.uoa.gr		Argostoliou 17a	Nea Makri	Attiki	Greece	19005	Yes
* Metadata Author	Anna	Chapman	The National and Kapodistrian University of Athens	0030 2294050204	a_chapman@biol.uoa.gr		Argostoliou 17a	Nea Makri	Attiki	Greece	19005	Yes
Author	Anna	Chapman	The National and Kapodistrian University of Athens	0030 2294050204	a_chapman@biol.uoa.gr		Argostoliou 17a	Nea Makri	Attiki	Greece	19005	Yes
Author
Author
Author
Author
Author
Author
Author
Author
Author
Author
Author
Keywords and Coverage					Latitude and longitude values are used to create a 'bounding box' containing the region of interest.
Regional Scope					Bounding Box	Decimal Lat.	Decimal Long.
General Keywords	Carabidae, Coleoptera, agriculture, farmland, cotton, maize, olives, wheat, cultivation, crops, heterogeneity				Upper Left	38°55'3.18"N	22°11'56.67"E
Keyword Thesaurus					Lower right	38°52'31.95"N	22°18'25.00"E
Begin Date or Single Date	May 2007
End Date	October 2008
Taxonomic Keywords	Coleoptera Carabidae
References	Use the fields below to record bibliographic citations. Copy and paste additional rows to accommodate more citations.
Reference	Anderson, R., McFerran, D. & Cameron, A. [2000] The Ground Beetles of Northern Ireland. Atlases of the Northern Ireland Flora and Fauna Volume 1. Ulster Museum. Ulster, Northern Ireland.
Reference	Arndt, E., Schnitter, P., Sfenthourakis, S. & Wrase, D. [2011] Ground Beetles (Carabidae) of Greece. Pensoft. Sofia, Bulgaria.
Reference	Benton, T., Vickery, J. & Wilson, J. [2003] Farmland Biodiversity: is Habitat Heterogeneity the Key? Trends in Ecology and Evolution 18: 182-188
Reference	Brandmayr, T., Zetto, T. & Pizzolotto, R. [2005] I Coleotteri Carabidi per la valutazione ambientale e la conservazione della biodiversità. APAT, Manuali e linee guida. 34. I.G.E.R. srl, Roma, 240 pp. [In Italian].
Reference	Brandmayr, T., Bonacci, T., Massolo, A. & Brandmayr, P. [2006] What is Going on Between Aposematic Carabid Beetles? The Case of Anchomenus dorsalis (Pontoppidan 1763) and Brachinus sclopeta (Fabricius, 1792) (Coleoptera Carabidae). Ethology Ecology & Evolution 18: 335-348.
Reference	Cárdenas Talaverón, A. & Piella, B. [1985] Fenología de las Espacies de Carábidos (Col. Carabidae) Más Abundantes en la Cuenca de Bembezar (NW. de la Provincia de Cordoba). Mediterranea Serie de Estudios Biológicos 8: 147-163.
Reference	Clark, M. (1999) Ground beetle abundance and community composition in conventional and organic tomato systems of California's Central Valley. Applied Soil Ecology 11: 199‑206.
Reference	Desender, K. & Turin, H. [1989] Loss of Habitats and Changes in the Composition of the Ground and Tiger Beetle Fauna in Four West European Countries since 1950 [Coleoptera: Carabidae, Cicindelidae]. Biological Conservation 48: 277-294.
Reference	Dunning, J., Danielson, B. & Pulliam, H. [1992] Ecological Processes That Affect Populations in Complex Landscapes. Oikos 65 (1): 169.
Reference	Eurostat [2012] Agricultural Statistics. Main results -2010-11. Eurostat Pocket Books. Office for Official Publications of the European Communities. Luxembourg.
Reference	Evans, A. Armstron-Brown, S & Grice, P [2002] The Role of Research and Development in the Evolution of a ‘Smart’ Agri-environment Scheme. Aspects of Applied Biology 67: 253‑264.
Reference	Eyre, M., Sanderson, R., Shotton, P, & Leifert, C. [2009] Investigating the effects of crop type, fertility management and crop protection on the activity of beneficial invertebrates in an extensive farm management comparison trial. Annals of Applied Biology 155 (2): 267‑276.
Reference	Fadda, S., Henry, F., Orgeas, J., Ponel, P., Buisson, E. & Dutoit, T. [2008] Consequences of the Cessation of 3000 Years of Grazing on Dry Mediterranean Grassland Ground-Active Beetle Assemblages. Comptes Rendus Biologies 331: 532-546.
Reference	Fahrig, L., Baudry, J., Brotons, L. Burel, F., Crist, T., Fuller, R., Sirami, C., Siriwardena, G., Martin, J-L., 2011. Functional landscape heterogeneity and animal biodiversity in agricultural landscapes. Ecology Letters 14, 101-112.
Reference	Holland, J. & Luff, M. [2000] The Effects of Agricultural Practices on Carabidae in Temperate Agroecosystems. Integrated Pest Management Reviews 5: 109-129.
Reference	Kasimis, C., Papadopoulos, A. & Zacopoulou, E. [2003] Migrants in Rural Greece. Sociologia Ruralis 43: 167-184.
Reference	Kromp, B. [1999] Carabid Beetles in Sustainable Agriculture: a Review on Pest Control Efficacy, Cultivation Impacts and Enhancement. Agriculture, Ecosystems and Environment 74: 187-228.
Reference	Louloudis, L. & Maraveyas, N. [1997] Farmers and Agricultural Policy in Greece since the Accession to the European Union. Sociologia Ruralis 37: 270-286.
Reference	Luff, M. [2007] The Carabidae (Ground Beetles) of Britain and Ireland. Handbooks for the Identification of British Insects. Vol. 4 Part 2 (2nd Ed.) Royal Entomological Society and the Field Studies Council.
Reference	Lundgren, J. [2009] Relationships of Natural Enemies and Non-Prey Foods. Progress in Biological Control 7: 143-165.
Reference	McGarigal, K., Cushman, S., Neel, M. & Ene, E. [2002] fragstats: Spatial Pattern Analysis Program for Categorical Maps. Computer Software Program Produced by the Authors at the University of Massachusetts, Amherst, USA.
Reference	Meissner, R. Zur Biologie und Ökologie der ripicolen Carabiden Bembidion femoratum Sturm und B. punctulatum Drap. II. Die Substratbindung. Zoologische Jahrbuecher Systematik 111: 369‑383.
Reference	Östman, Ö., Ekbom, B., Bengtsson, J. & Weibull, A. [2001] Landscape Complexity and Farming Practice Influence the Condition of Polyphagous Carabid Beetles. Ecological Applications 11: 480-488.
Reference	Pavlícek, T., Chikatunov, V. & Nevo, E. [2005] Arthropods in the Mounds of Mole Rats, Spalax ehrenbergi Superspecies, in Israel. Ecologia Mediterranea 31: 5-13
Reference	Petit, S., Boursault, A., Le Guilloux, M., Munier-Jolain, N. & Reboud, X. [2011] Weeds in Agricultural Landscapes. A Review. Agronomy for Sustainable Development 31: 309-317.
Reference	Pfiffner, L. & Niggli, U. [1996) Effects of Bio-dynamic, Organic and Conventional Farming on Ground Beetles (Col. Carabidae) and Other Epigaeic Arthropods in Winter Wheat. Biological Agriculture & Horticulture 12 (4): 353‑364.
Reference	Pollard, E. [1968] Hedges III. The Effect of Removal of the Bottom Flora of a Hawthorn Hedge on the Carabidae of the Hedge Bottom. Journal of Applied Ecology 5: 125-139.
Reference	Popovic, A. & Štrbac, P. [2010] Occurrence and Fauna Composition of Ground Beetles in Wheat Fields. Journal of Central European Agriculture 11: 423-432.
Reference	Sienkiewicz, P. [2008] Pachycarus (Mysteropterus) cyaneus (Dejean 1825) - Species of Ground Beetles (Coleoptera, Carabidae) New for Bulgaria‘s Fauna. Polish Journal of Entomology 77: 63-66.
Reference	Sotherton, N. [1985] The Distribution and Abundance of Predatory Coleoptera Overwintering in Field Boundaries. Annals of Applied Biology 106: 17-21.
Reference	Sunderland, K. & Samu, F. [2000] Effects of Agricultural Diversification on the Abundance, Distribution and Pest Control Potential of Spiders: a Review. Entomologia Experimentalis et Applicata 95: 1-13.
Reference	Thiele, H. [1977] Carabid Beetles in Their Environments. Springer. Berlin/Heidelberg, Germany.
Reference	Torjbio, M. [2006] Nota Sobre el Género Calathus Bonelli, 1810, en la Península Ibérica (Coleoptera, Carabidae. Bulletin de la Société Entomologique de France 111: 51-57.
Reference	Trautner, J. & Geigenmüller, K. [1987] Tiger Beetles Ground Beetles. Illustrated Key to the Cicindelidae and Carabidae of Europe. Josef Margraf. Aichtal, Germany.
Reference	Tscharntke, T., Klein, A., Kruess, A. Steffan-Dewenter, I. & Thies, C. [2005] Landscape Perspectives on Agricultural Intensification and Biodiversity – Ecosystem Service Management. Ecology Letters 8: 857-874.
Reference	Vanbergen, A., Woodcock., B.; Koivula, M., Niemelä, J., Kotze, J., Bolger, D., Golden, V., Dubs, F., Boulanger, G., Serrano, J., Lencina, J., Serrano, A., Aguiar, C., Grandchamp, A., Stofer, S., Szél, G., Ivits, E., Adler, P., Markus, J. & Watt, A. [2010] Trophic Level Modulates Carabid Beetle Responses to Habitat and Landscape Structure: a Pan-European Study. Ecological Entomology 35: 226-235.
Reference	Varvara, M. & Apostol, E. [2008] Diversity and the Main Ecological Requirements of the Epigeic Species of Carabidae (Coleoptera, Carabidae) in the Sun Flower Ecosystem, Broscauti (Botosani County). Analele Stiintifice ale Universitatii „AI. I. Cuza” Iasi, s. Biologie animala, Tom LIV.
Reference	Weibull, A., Bengtsson, J. & Nohlgren, E. [2000] Diversity of Butterflies in the Agricultural Landscape: the Role of Farming System and Landscape Heterogeneity. Ecography 23: 743-750.

## Sheet: Chapman_Landscape_Metrics_SupplementaryFile
Landscape Metric	Cotton Field A		Cotton Field B		Maize Field A		Maize Field B		Olive Field A		Olive Field B		Wheat Field A		Wheat Field B
	Heterogeneous Area		Homogeneous Area		Heterogeneous Area		Homogeneous Area		Heterogeneous Area		Homogeneous Area		Heterogeneous Area		Homogeneous Area
% Non-Cropped Habitat	45.3		16.5		27.3		7.1		31.5		29.4		45.3		42
Land Use Aggregation	85		92		85		92		62		94		85		88
Land Use Similarity (Similarity to Sampled Field)	52		466		111		769		396		1787		276		886
Land Use Richness	7		7		10		8		9		3		7		8
Land Use Diversity	0.8		0.58		0.86		0.36		0.81		0.03		0.8		0.78
Mean Field Area (ha)	0.5		0.87		0.18		0.5		0.03		1		0.5		0.83
